# Supplementary material for: Ionic liquids as modulators of physicochemical properties and nanostructures of sodium dodecyl sulfate in aqueous solutions and potential application in pesticide microemulsions
Source: Royal Society of Chemistry journal article supplement (doi:10.1039/c6cp04722j), 2016-01-01
Supplement: c6cp04722j1.pdf [file c6cp04722j1.pdf]

**Supporting information for:**

**Ionic Liquids as Modulators of Physicochemical Properties and Nanostructures of Sodium  
Dodecyl Sulfate in Aqueous Solutions and Potential Application in Pesticide Microemulsion**

Jing Li<sup>a</sup>, Tengfei Fan<sup>b</sup>, Yong Xu<sup>a</sup> and Xuemin Wu<sup>\*a</sup>

<sup>a</sup> College of Science, China Agricultural University, Yuanmingyuan west road 2, Haidian  
district, Beijing, 100193, China.

<sup>b</sup> College of Resources and Environmental Sciences, China Agricultural University,  
Yuanmingyuan west road 2, Haidian district, Beijing, 100193, China.

**Table S1** The values of CMC from Tensiometry and Conductometry Plots for ILs in aqueous solutions

| ILs                        | CMC <sup>a</sup> (mmol·kg <sup>-1</sup> ) | CMC <sup>b</sup> (mmol·kg <sup>-1</sup> ) |
|----------------------------|-------------------------------------------|-------------------------------------------|
| [C <sub>6</sub> mpyr][Br]  | 55.94                                     | 55.00                                     |
| [C <sub>8</sub> mpyr][Br]  | 45.88                                     | 44.91                                     |
| [C <sub>12</sub> mpyr][Br] | 13.25                                     | 11.96                                     |
| [C <sub>16</sub> mpyr][Br] | 1.08                                      | 0.82                                      |
| [C <sub>6</sub> mp][Br]    | 57.91                                     | 57.03                                     |
| [C <sub>6</sub> mm][Br]    | 58.60                                     | 57.57                                     |

Note: a-The values obtained from tensiometry. B-The values obtained from conductometry

**Table S2** The values of CMC,  $\alpha$ ,  $\beta$ , and thermodynamic parameters for SDS-ILs in aqueous solutions at different temperatures

| ILs                       | wt%  | T (K) | CMC<br>mmol · kg <sup>-1</sup> | $\alpha$ | $\beta$ | $\Delta G_m^0$<br>(kJ · mol <sup>-1</sup> ) | $\Delta H_m^0$<br>(kJ · mol <sup>-1</sup> ) | $\Delta S_m^0$<br>(J · K <sup>-1</sup> · mol <sup>-1</sup> ) |
|---------------------------|------|-------|--------------------------------|----------|---------|---------------------------------------------|---------------------------------------------|--------------------------------------------------------------|
| water                     |      | 298   | 7.89                           | 0.40     | 0.60    | -35.12                                      | -4.84                                       | 101.60                                                       |
|                           |      | 308   | 8.02                           | 0.40     | 0.60    | -36.23                                      | -5.17                                       | 100.84                                                       |
|                           |      | 318   | 8.51                           | 0.41     | 0.59    | -36.93                                      | -5.48                                       | 98.88                                                        |
|                           |      | 328   | 8.88                           | 0.42     | 0.58    | -37.66                                      | -5.79                                       | 97.16                                                        |
| [C <sub>6</sub> mpyr][Br] | 0.02 | 298   | 9.71                           | 0.51     | 0.49    | -31.94                                      | -3.08                                       | 96.84                                                        |
|                           |      | 308   | 10.51                          | 0.51     | 0.49    | -32.71                                      | -3.29                                       | 95.52                                                        |
|                           |      | 318   | 10.56                          | 0.51     | 0.49    | -33.75                                      | -3.51                                       | 95.11                                                        |
|                           |      | 328   | 10.67                          | 0.52     | 0.48    | -34.54                                      | -3.71                                       | 94.00                                                        |
|                           | 0.05 | 298   | 11.29                          | 0.61     | 0.39    | -29.28                                      | -5.85                                       | 78.61                                                        |
|                           |      | 308   | 12.08                          | 0.61     | 0.39    | -30.02                                      | -6.25                                       | 77.17                                                        |
|                           |      | 318   | 12.70                          | 0.65     | 0.35    | -29.92                                      | -6.47                                       | 73.75                                                        |
|                           |      | 328   | 13.42                          | 0.66     | 0.34    | -30.43                                      | -6.83                                       | 71.95                                                        |
|                           | 0.07 | 298   | 12.30                          | 0.64     | 0.36    | -28.36                                      | -3.82                                       | 82.35                                                        |
|                           |      | 308   | 12.49                          | 0.65     | 0.35    | -29.04                                      | -4.05                                       | 81.14                                                        |
|                           |      | 318   | 13.35                          | 0.67     | 0.33    | -29.30                                      | -4.25                                       | 78.78                                                        |
|                           |      | 328   | 13.67                          | 0.68     | 0.33    | -30.14                                      | -4.52                                       | 78.10                                                        |
|                           | 0.1  | 298   | 13.59                          | 0.67     | 0.33    | -27.40                                      | -3.63                                       | 79.75                                                        |
|                           |      | 308   | 13.62                          | 0.67     | 0.33    | -28.31                                      | -3.88                                       | 79.32                                                        |
|                           |      | 318   | 14.69                          | 0.70     | 0.30    | -28.31                                      | -4.04                                       | 76.31                                                        |
|                           |      | 328   | 15.01                          | 0.72     | 0.28    | -28.68                                      | -4.24                                       | 74.52                                                        |
| 0.5                       | 298  | 25.37 | 0.83                           | 0.17     | -22.28  | -0.78                                       | 72.17                                       |                                                              |
|                           | 308  | 25.74 | 0.84                           | 0.16     | -22.79  | -0.82                                       | 71.33                                       |                                                              |
|                           | 318  | 25.91 | 0.87                           | 0.13     | -22.90  | -0.86                                       | 69.34                                       |                                                              |
|                           | 328  | 26.11 | 0.87                           | 0.13     | -23.60  | -0.91                                       | 69.18                                       |                                                              |
| 1                         | 298  | 29.98 | 0.98                           | 0.02     | -18.99  | -1.66                                       | 58.18                                       |                                                              |
|                           | 308  | 30.12 | 0.98                           | 0.02     | -19.62  | -1.77                                       | 57.95                                       |                                                              |
|                           | 318  | 31.39 | 0.99                           | 0.01     | -19.95  | -1.87                                       | 56.85                                       |                                                              |

|                            |      |       |       |      |        |        |        |        |
|----------------------------|------|-------|-------|------|--------|--------|--------|--------|
| [C <sub>8</sub> mpyr][Br]  | 0.02 | 328   | 31.84 | 0.99 | 0.01   | -20.53 | -1.99  | 56.55  |
|                            |      | 298   | 10.33 | 0.54 | 0.46   | -31.07 | -3.67  | 91.97  |
|                            |      | 308   | 10.67 | 0.55 | 0.45   | -31.77 | -3.89  | 90.54  |
|                            |      | 318   | 11.08 | 0.60 | 0.40   | -31.54 | -4.00  | 86.58  |
|                            | 0.05 | 328   | 11.43 | 0.61 | 0.39   | -32.18 | -4.23  | 85.21  |
|                            |      | 298   | 11.10 | 0.53 | 0.47   | -31.02 | -2.71  | 95.00  |
|                            |      | 308   | 11.44 | 0.53 | 0.47   | -31.95 | -2.90  | 94.32  |
|                            |      | 318   | 11.89 | 0.57 | 0.43   | -31.94 | -3.01  | 91.00  |
|                            | 0.07 | 328   | 11.91 | 0.61 | 0.39   | -32.02 | -3.11  | 88.15  |
|                            |      | 298   | 11.80 | 0.55 | 0.45   | -30.38 | -2.36  | 94.04  |
|                            |      | 308   | 11.65 | 0.56 | 0.44   | -31.23 | -2.50  | 93.28  |
|                            |      | 318   | 12.17 | 0.59 | 0.41   | -31.41 | -2.61  | 90.57  |
|                            | 0.1  | 328   | 12.51 | 0.63 | 0.37   | -31.38 | -2.70  | 87.44  |
|                            |      | 298   | 12.22 | 0.57 | 0.43   | -29.84 | -6.12  | 79.57  |
|                            |      | 308   | 13.46 | 0.60 | 0.40   | -29.84 | -6.40  | 76.10  |
|                            |      | 318   | 14.23 | 0.66 | 0.34   | -29.30 | -6.53  | 71.58  |
|                            | 0.5  | 328   | 14.56 | 0.67 | 0.33   | -29.91 | -6.90  | 70.15  |
|                            |      | 298   | 17.25 | 0.71 | 0.29   | -25.80 | -7.05  | 62.93  |
|                            |      | 308   | 18.89 | 0.73 | 0.27   | -25.96 | -7.41  | 60.22  |
|                            |      | 318   | 20.23 | 0.75 | 0.25   | -26.15 | -7.78  | 57.79  |
| 1                          | 328  | 21.56 | 0.77  | 0.23 | -26.33 | -8.14  | 55.46  |        |
|                            | 298  | 19.21 | 0.88  | 0.12 | -22.09 | -11.74 | 34.72  |        |
|                            | 308  | 27.18 | 0.89  | 0.11 | -21.64 | -12.43 | 29.90  |        |
|                            | 318  | 29.65 | 0.90  | 0.10 | -21.89 | -13.13 | 27.54  |        |
| [C <sub>12</sub> mpyr][Br] | 0.02 | 328   | 30.00 | 0.90 | 0.10   | -22.54 | -13.97 | 26.13  |
|                            |      | 298   | 10.02 | 0.43 | 0.57   | -33.53 | -1.85  | 106.30 |
|                            |      | 308   | 10.16 | 0.46 | 0.54   | -33.94 | -1.94  | 103.89 |
|                            |      | 318   | 10.41 | 0.47 | 0.53   | -34.72 | -2.06  | 102.70 |
|                            | 0.05 | 328   | 10.49 | 0.47 | 0.53   | -35.78 | -2.19  | 102.40 |
|                            |      | 298   | 10.87 | 0.45 | 0.55   | -32.79 | -0.34  | 108.89 |
|                            |      | 308   | 10.96 | 0.51 | 0.49   | -32.55 | -0.35  | 104.53 |
|                            |      | 318   | 10.97 | 0.52 | 0.48   | -33.38 | -0.37  | 103.78 |
|                            | 0.07 | 328   | 10.99 | 0.53 | 0.47   | -34.19 | -0.39  | 103.02 |
|                            |      | 298   | 11.07 | 0.51 | 0.49   | -31.45 | -2.42  | 97.43  |
|                            |      | 308   | 11.19 | 0.53 | 0.47   | -32.03 | -2.55  | 95.72  |
|                            |      | 318   | 11.46 | 0.56 | 0.44   | -32.31 | -2.66  | 93.22  |
|                            | 0.1  | 328   | 11.81 | 0.58 | 0.42   | -32.74 | -2.79  | 91.31  |
|                            |      | 298   | 11.17 | 0.58 | 0.42   | -29.94 | -7.44  | 75.50  |
|                            |      | 308   | 13.29 | 0.60 | 0.40   | -29.89 | -7.84  | 71.59  |
|                            |      | 318   | 13.86 | 0.61 | 0.39   | -30.48 | -8.30  | 69.77  |
|                            | 0.5  | 328   | 13.96 | 0.62 | 0.38   | -31.19 | -8.76  | 68.37  |
|                            |      | 298   | 11.91 | 0.60 | 0.40   | -29.29 | -17.06 | 41.05  |
|                            |      | 308   | 15.23 | 0.63 | 0.37   | -28.76 | -17.83 | 35.49  |
|                            |      | 318   | 18.58 | 0.67 | 0.33   | -28.13 | -18.45 | 30.43  |

|                            |      |     |       |      |      |        |        |        |
|----------------------------|------|-----|-------|------|------|--------|--------|--------|
|                            |      | 328 | 19.32 | 0.69 | 0.31 | -28.43 | -19.33 | 27.75  |
|                            | 1    | 298 | 12.32 | 0.69 | 0.31 | -27.28 | -22.25 | 16.89  |
|                            |      | 308 | 23.45 | 0.71 | 0.29 | -25.64 | -23.40 | 7.26   |
|                            |      | 318 | 25.17 | 0.75 | 0.25 | -25.41 | -24.17 | 3.91   |
|                            |      | 328 | 25.86 | 0.85 | 0.15 | -24.03 | -23.66 | 1.14   |
| [C <sub>16</sub> mpyr][Br] | 0.02 | 298 | 9.32  | 0.45 | 0.55 | -33.38 | -4.01  | 98.58  |
|                            |      | 308 | 10.02 | 0.47 | 0.53 | -33.77 | -4.22  | 95.94  |
|                            |      | 318 | 10.34 | 0.48 | 0.52 | -34.52 | -4.47  | 94.48  |
|                            |      | 328 | 10.38 | 0.48 | 0.52 | -35.59 | -4.76  | 93.99  |
|                            | 0.05 | 298 | 9.86  | 0.46 | 0.54 | -32.95 | -2.05  | 103.71 |
|                            |      | 308 | 10.23 | 0.47 | 0.53 | -33.69 | -2.17  | 102.34 |
|                            |      | 318 | 10.37 | 0.47 | 0.53 | -34.73 | -2.32  | 101.94 |
|                            |      | 328 | 10.41 | 0.48 | 0.52 | -35.57 | -2.45  | 100.99 |
|                            | 0.07 | 298 | 11.04 | 0.52 | 0.48 | -31.25 | -1.86  | 98.64  |
|                            |      | 308 | 11.09 | 0.52 | 0.48 | -32.28 | -1.98  | 98.38  |
|                            |      | 318 | 11.35 | 0.56 | 0.44 | -32.34 | -2.06  | 95.24  |
|                            |      | 328 | 11.58 | 0.58 | 0.42 | -32.82 | -2.16  | 93.48  |
|                            | 0.1  | 298 | 11.14 | 0.53 | 0.47 | -31.01 | -5.32  | 86.21  |
|                            |      | 308 | 12.57 | 0.54 | 0.46 | -31.38 | -5.64  | 83.56  |
|                            |      | 318 | 12.85 | 0.56 | 0.44 | -31.87 | -5.93  | 81.56  |
|                            |      | 328 | 13.01 | 0.56 | 0.44 | -32.82 | -6.31  | 80.83  |
|                            | 0.5  | 298 | 11.75 | 0.57 | 0.43 | -29.96 | -5.70  | 81.41  |
|                            |      | 308 | 12.78 | 0.58 | 0.42 | -30.44 | -6.05  | 79.21  |
|                            |      | 318 | 13.58 | 0.60 | 0.40 | -30.77 | -6.36  | 76.76  |
|                            |      | 328 | 13.78 | 0.62 | 0.38 | -31.22 | -6.67  | 74.88  |
|                            | 1    | 298 | 12.01 | 0.63 | 0.37 | -28.61 | -18.91 | 32.55  |
|                            |      | 308 | 19.96 | 0.64 | 0.36 | -27.59 | -20.06 | 24.45  |
|                            |      | 318 | 21.42 | 0.65 | 0.35 | -28.02 | -21.22 | 21.38  |
|                            |      | 328 | 21.88 | 0.66 | 0.34 | -28.61 | -22.41 | 18.90  |
| [C <sub>6</sub> mp][Br]    | 0.02 | 298 | 9.69  | 0.50 | 0.50 | -32.16 | -3.10  | 97.52  |
|                            |      | 308 | 9.89  | 0.52 | 0.48 | -32.72 | -3.27  | 95.62  |
|                            |      | 318 | 10.21 | 0.52 | 0.48 | -33.66 | -3.48  | 94.89  |
|                            |      | 328 | 10.52 | 0.53 | 0.47 | -34.36 | -3.68  | 93.54  |
|                            | 0.05 | 298 | 11.78 | 0.59 | 0.41 | -29.55 | -3.54  | 87.28  |
|                            |      | 308 | 12.34 | 0.65 | 0.35 | -29.08 | -3.62  | 82.66  |
|                            |      | 318 | 12.89 | 0.69 | 0.31 | -28.98 | -3.74  | 79.37  |
|                            |      | 328 | 13.01 | 0.69 | 0.31 | -29.86 | -3.98  | 78.90  |
|                            | 0.07 | 298 | 12.55 | 0.62 | 0.38 | -28.70 | -2.95  | 86.40  |
|                            |      | 308 | 12.95 | 0.66 | 0.34 | -28.70 | -3.06  | 83.23  |
|                            |      | 318 | 13.44 | 0.67 | 0.33 | -29.28 | -3.24  | 81.88  |
|                            |      | 328 | 13.64 | 0.69 | 0.31 | -29.69 | -3.40  | 80.17  |
|                            | 0.1  | 298 | 13.14 | 0.67 | 0.33 | -27.51 | -1.47  | 87.38  |
|                            |      | 308 | 13.24 | 0.70 | 0.30 | -27.77 | -1.54  | 85.16  |
|                            |      | 318 | 13.50 | 0.72 | 0.28 | -28.16 | -1.61  | 83.48  |

|                         |      |     |       |      |      |        |       |        |
|-------------------------|------|-----|-------|------|------|--------|-------|--------|
|                         |      | 328 | 13.71 | 0.75 | 0.25 | -28.31 | -1.68 | 81.21  |
|                         | 0.5  | 298 | 23.21 | 0.71 | 0.29 | -24.85 | -1.24 | 79.24  |
|                         |      | 308 | 23.89 | 0.73 | 0.27 | -25.19 | -1.30 | 77.57  |
|                         |      | 318 | 24.03 | 0.74 | 0.26 | -25.79 | -1.38 | 76.77  |
|                         |      | 328 | 24.22 | 0.76 | 0.24 | -26.15 | -1.44 | 75.33  |
|                         | 1    | 298 | 37.43 | 0.91 | 0.09 | -19.70 | -1.85 | 59.89  |
|                         |      | 308 | 38.24 | 0.91 | 0.09 | -20.30 | -1.98 | 59.49  |
|                         |      | 318 | 39.38 | 0.92 | 0.08 | -20.68 | -2.09 | 58.47  |
|                         |      | 328 | 40.00 | 0.94 | 0.06 | -20.89 | -2.18 | 57.05  |
| [C <sub>6</sub> mm][Br] | 0.02 | 298 | 10.40 | 0.50 | 0.50 | -31.90 | -0.66 | 104.81 |
|                         |      | 308 | 10.44 | 0.54 | 0.46 | -32.08 | -0.69 | 101.90 |
|                         |      | 318 | 10.50 | 0.55 | 0.45 | -32.87 | -0.73 | 101.06 |
|                         |      | 328 | 10.59 | 0.55 | 0.45 | -33.87 | -0.78 | 100.88 |
|                         | 0.05 | 298 | 11.90 | 0.94 | 0.06 | -22.19 | -2.19 | 67.10  |
|                         |      | 308 | 12.32 | 0.59 | 0.41 | -30.38 | -3.11 | 88.52  |
|                         |      | 318 | 12.68 | 0.66 | 0.34 | -29.71 | -3.15 | 83.49  |
|                         |      | 328 | 12.94 | 0.67 | 0.33 | -30.34 | -3.33 | 82.34  |
|                         | 0.07 | 298 | 14.36 | 0.65 | 0.35 | -27.63 | -1.30 | 88.37  |
|                         |      | 308 | 14.56 | 0.65 | 0.35 | -28.51 | -1.38 | 88.06  |
|                         |      | 318 | 14.67 | 0.68 | 0.32 | -28.75 | -1.44 | 85.88  |
|                         |      | 328 | 14.97 | 0.72 | 0.28 | -28.69 | -1.49 | 82.93  |
|                         | 0.1  | 298 | 15.61 | 0.71 | 0.29 | -26.13 | -2.10 | 80.66  |
|                         |      | 308 | 15.93 | 0.84 | 0.16 | -24.23 | -2.01 | 72.13  |
|                         |      | 318 | 16.51 | 0.86 | 0.14 | -24.48 | -2.11 | 70.34  |
|                         |      | 328 | 16.59 | 0.87 | 0.13 | -25.01 | -2.22 | 69.47  |
|                         | 0.5  | 298 | 26.93 | 0.84 | 0.16 | -21.92 | -1.20 | 69.54  |
|                         |      | 308 | 27.84 | 0.85 | 0.15 | -22.36 | -1.27 | 68.49  |
|                         |      | 318 | 28.01 | 0.87 | 0.13 | -22.67 | -1.33 | 67.11  |
|                         |      | 328 | 28.20 | 0.88 | 0.12 | -23.16 | -1.40 | 66.32  |
|                         | 1    | 298 | 39.93 | 0.91 | 0.09 | -19.52 | -0.89 | 62.54  |
|                         |      | 308 | 40.15 | 0.94 | 0.06 | -19.61 | -0.92 | 60.68  |
|                         |      | 318 | 41.02 | 0.96 | 0.04 | -19.80 | -0.96 | 59.25  |
|                         |      | 328 | 41.08 | 0.97 | 0.03 | -20.23 | -1.01 | 58.57  |

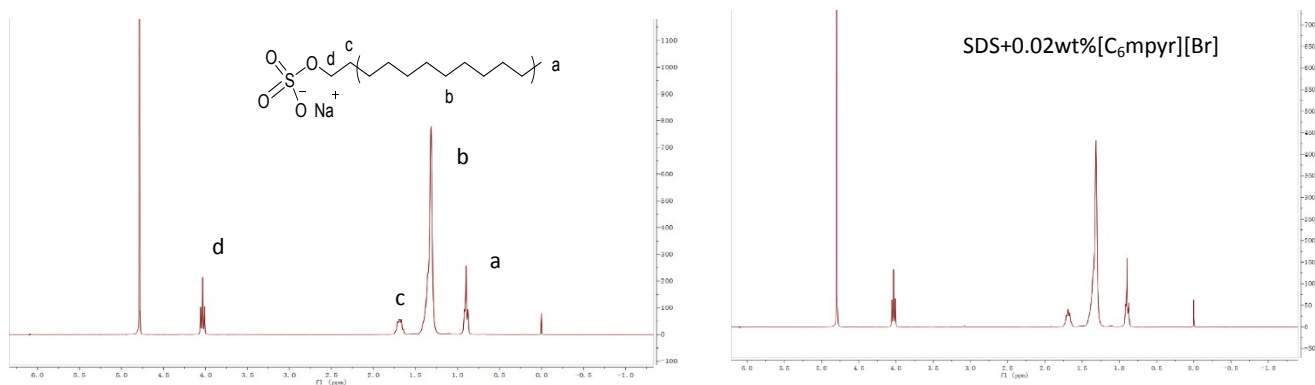



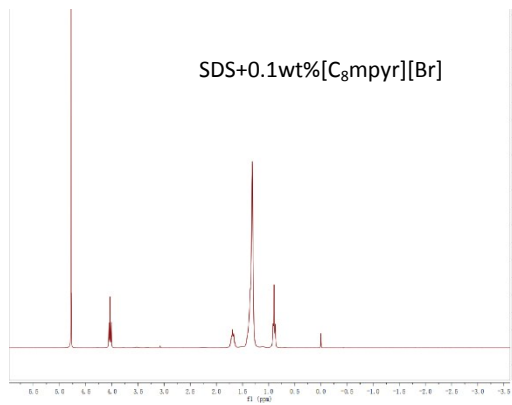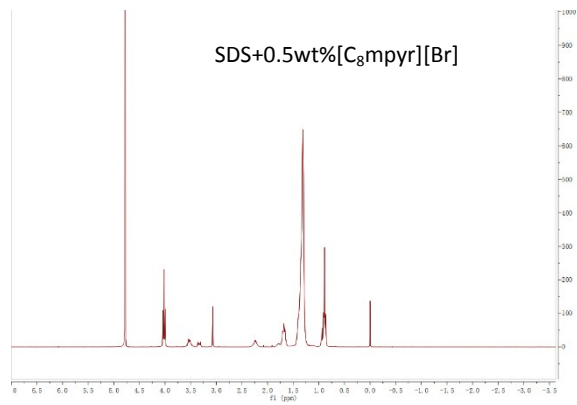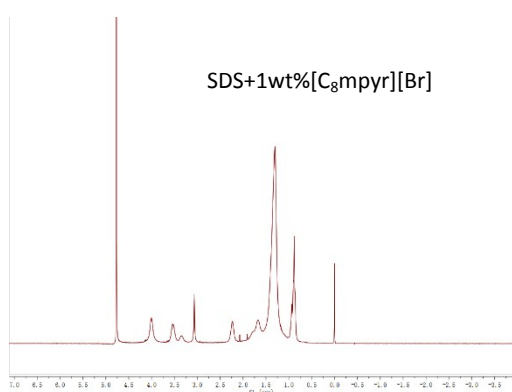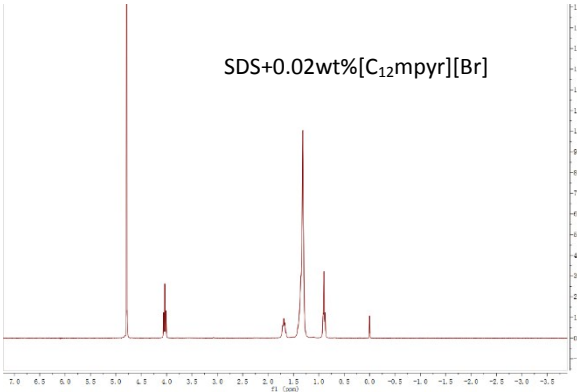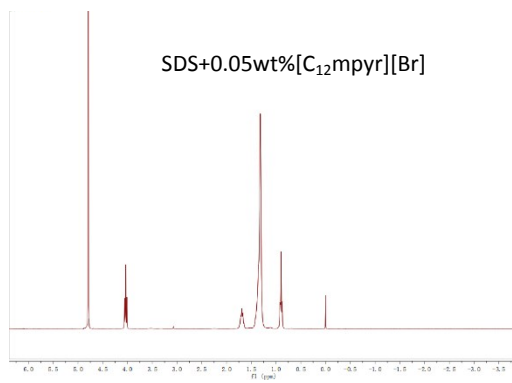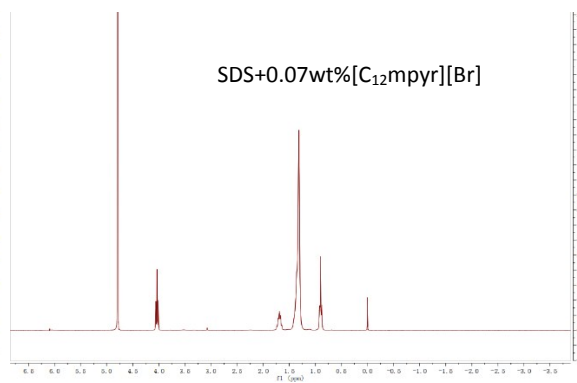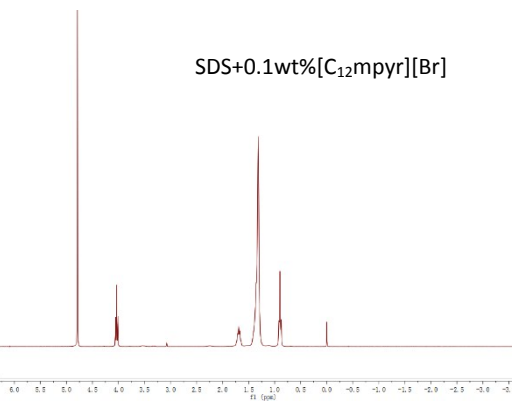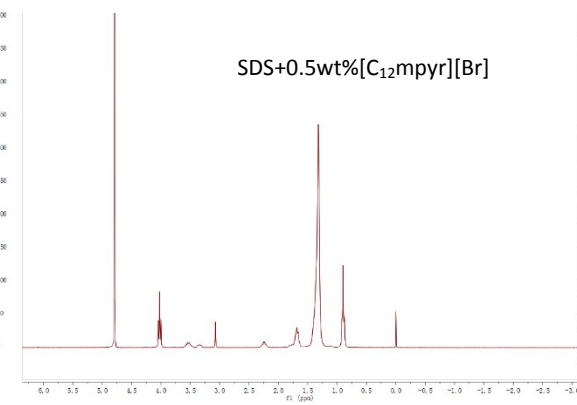

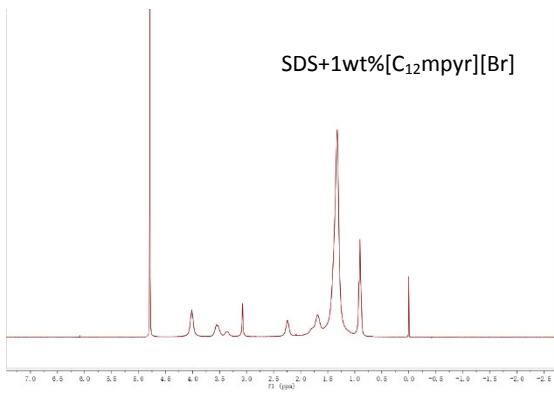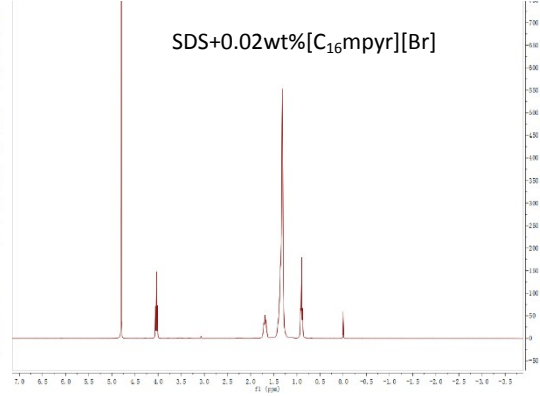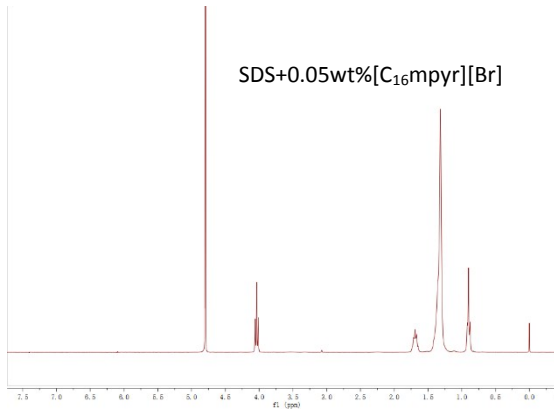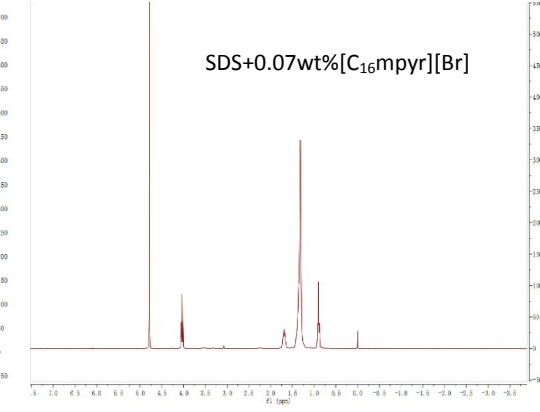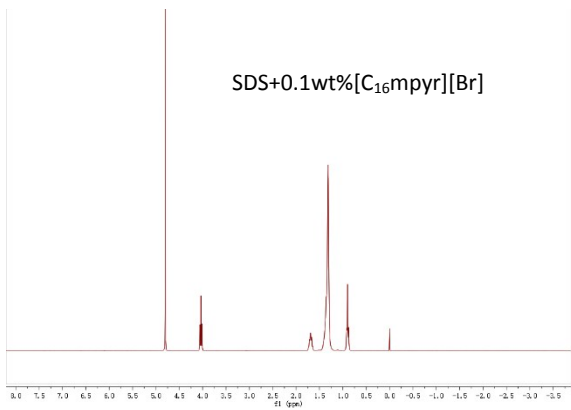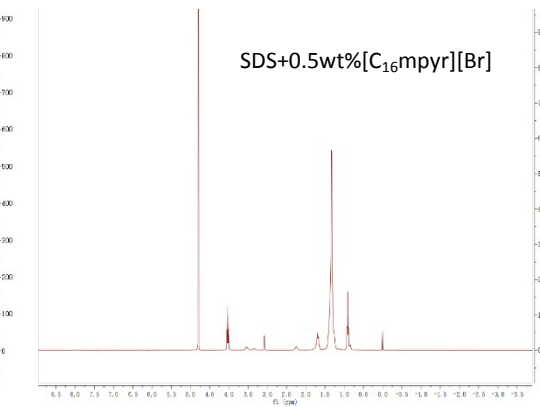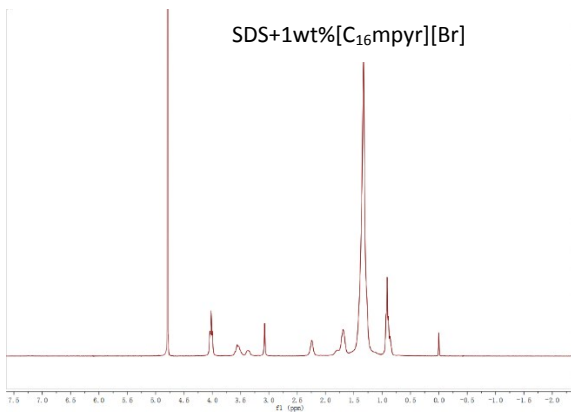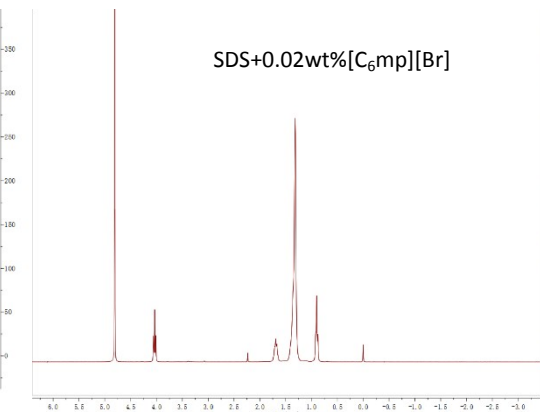



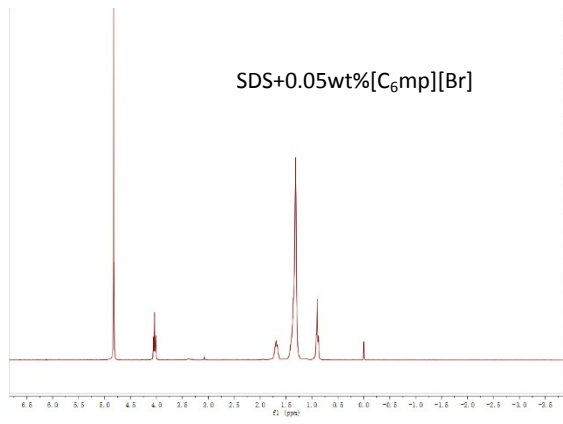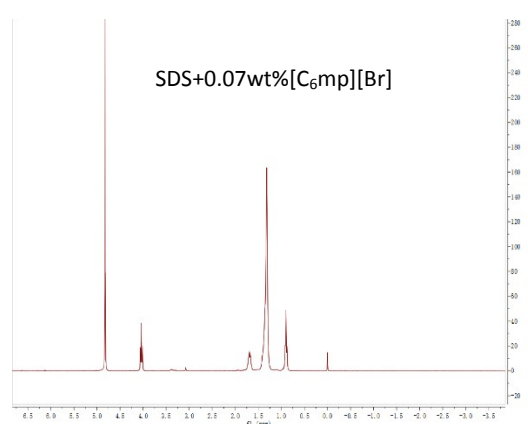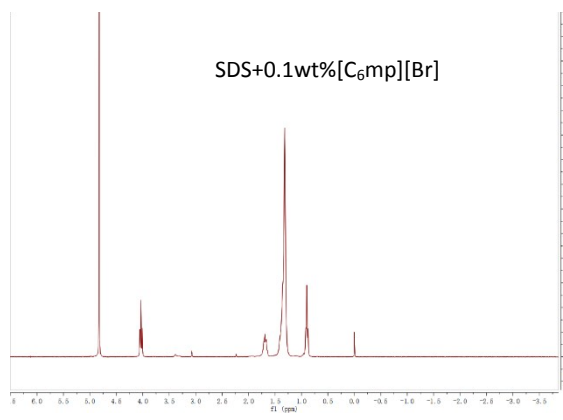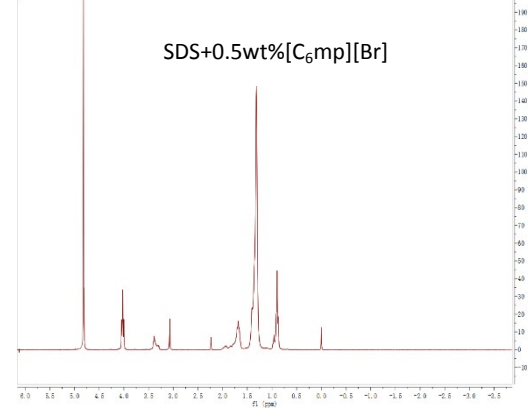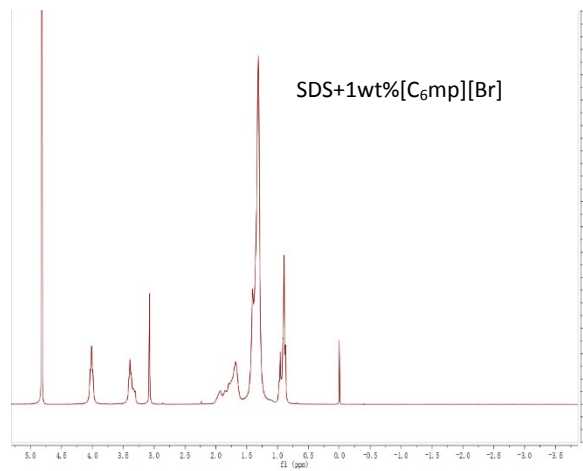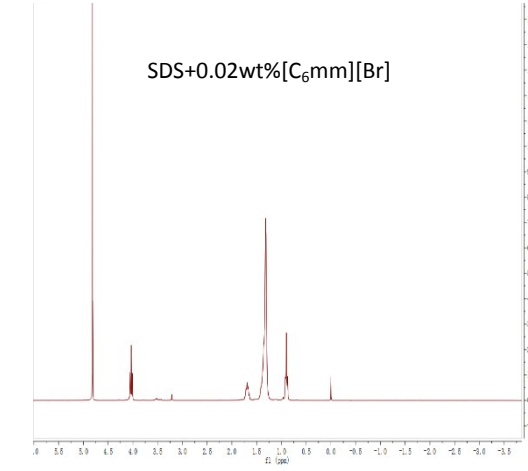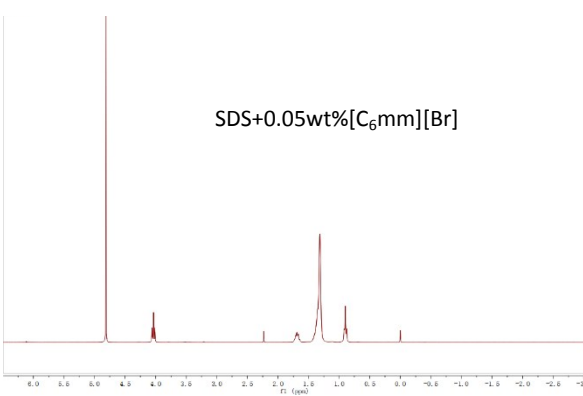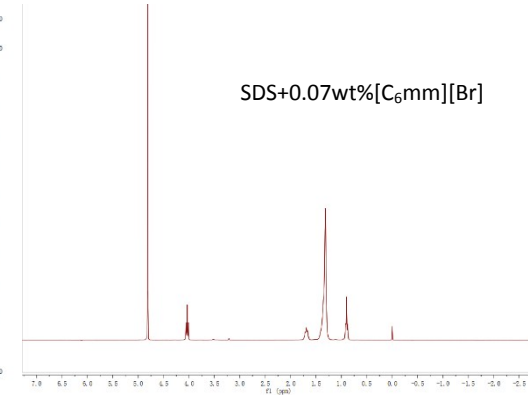

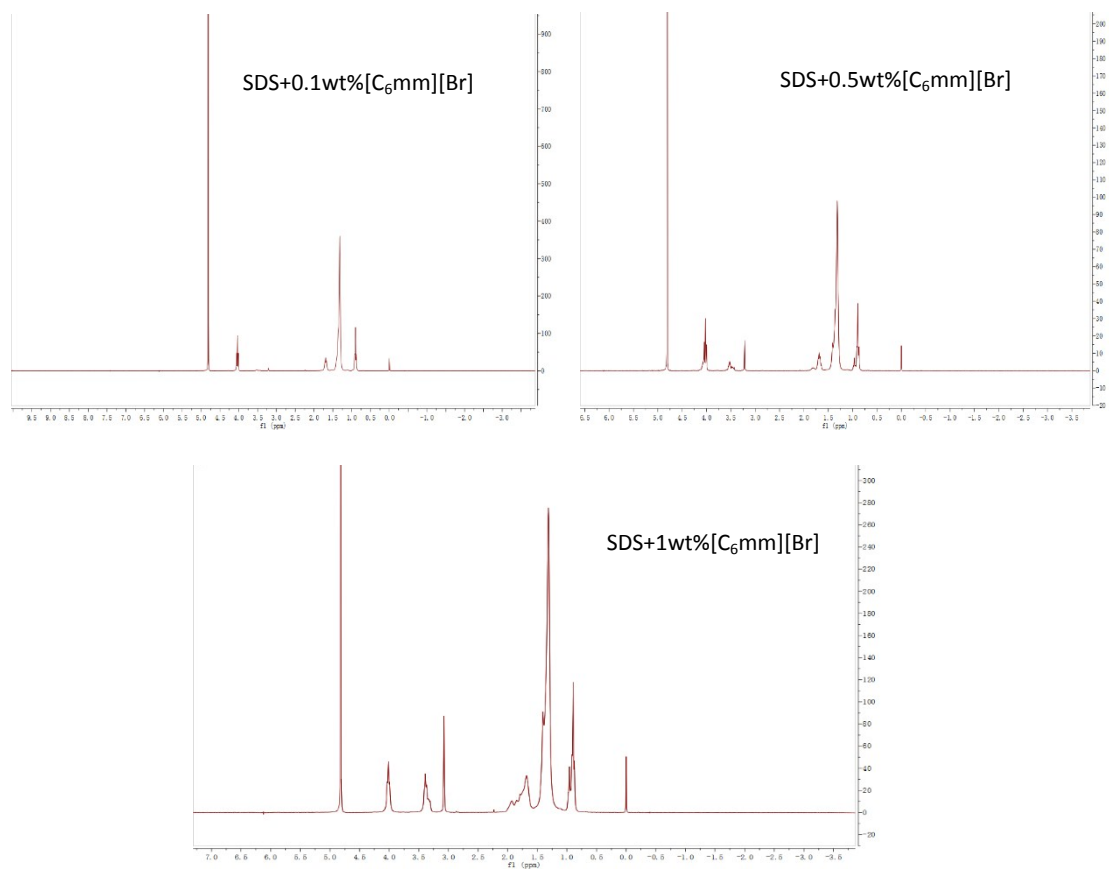

Fig. S1  $^1\text{H}$  NMR spectra of SDS and mixture of SDS-ILs
